# Supplementary material
Source: MDPI journal article supplement (https://www.mdpi.com/2073-4441/9/5/346)
Supplement: s1 [file s1]

Article

# Supplementary Materials: Summer season water temperature modeling under the climate change: case study for Fourchue River, Quebec, Canada

Jaewon Kwak, André St-Hilaire, Fetah Chebana and Gilho Kim

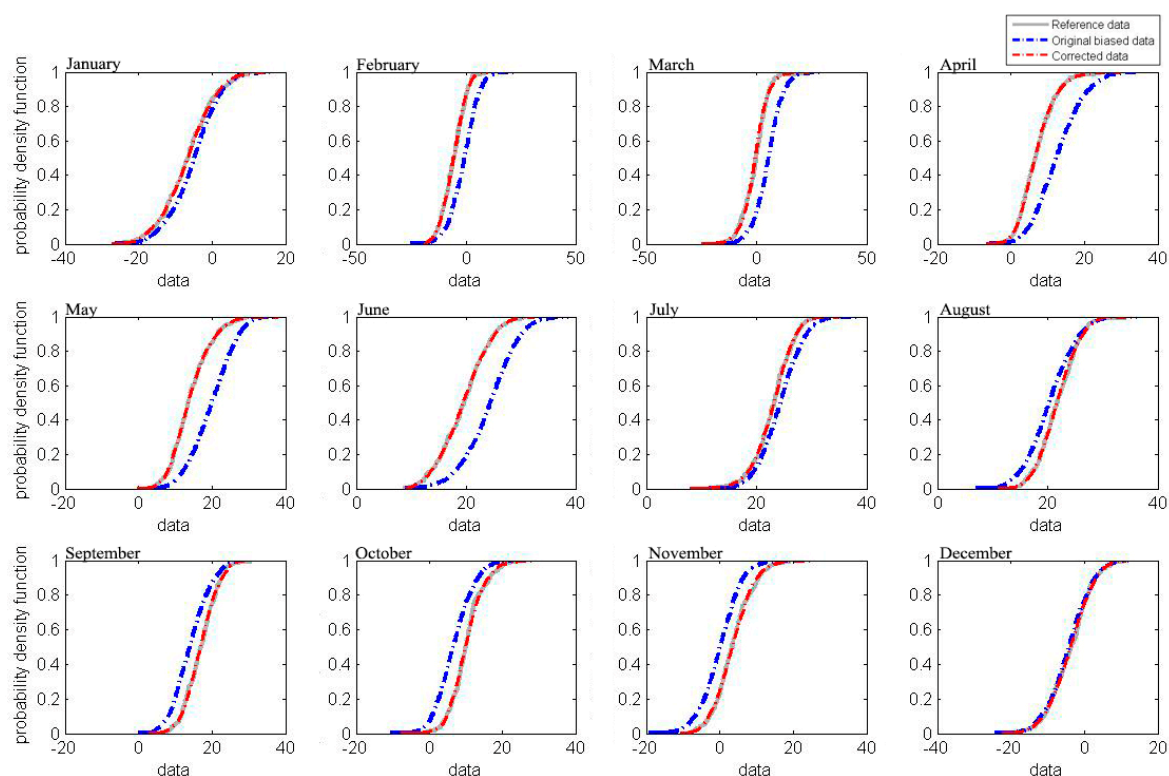

**Figure S1.** Quantile mapping results of maximum temperature for each month with CanESM2 and RCP 2.6 scenarios.

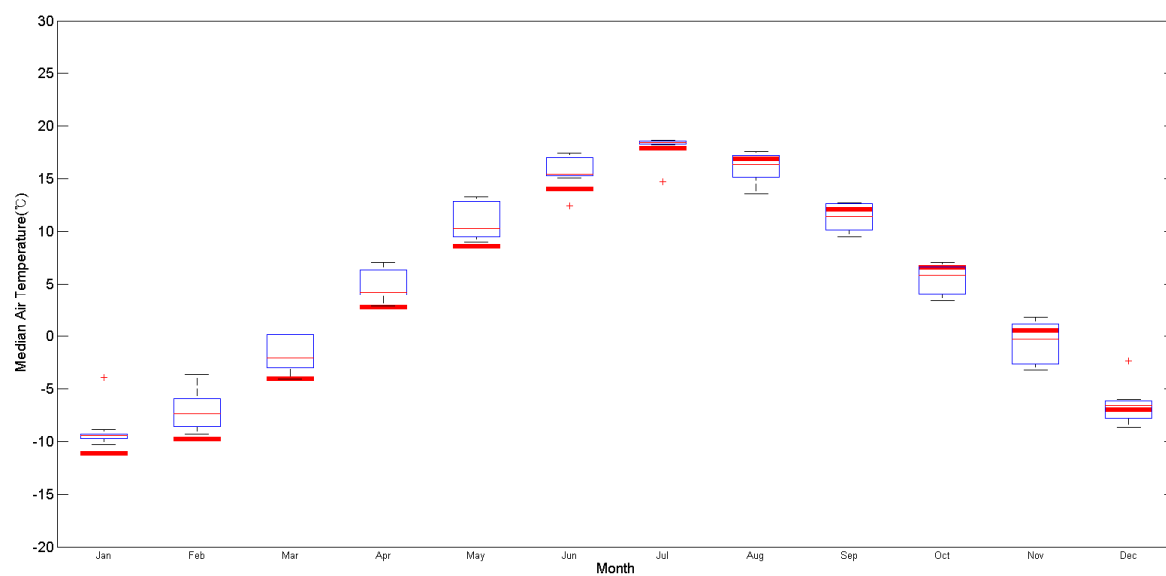

**Figure S2.** Boxplot of monthly median air temperature from 2020 to 2096 years for RCP 2.6 with 9 climate models; bold red line indicate monthly median temperature for observed period (2011 to 2014).

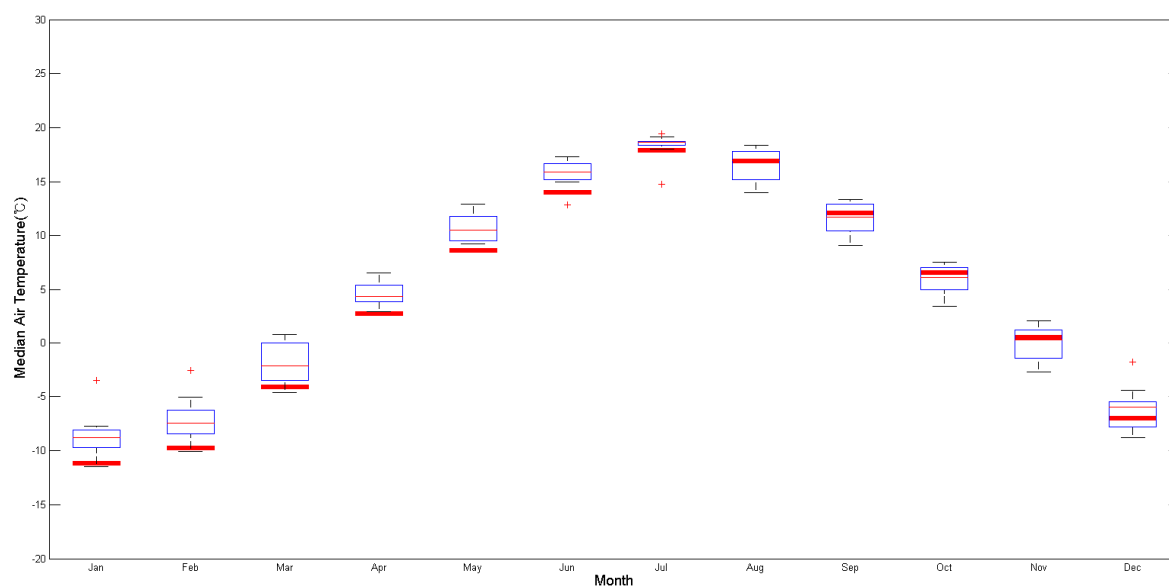

**Figure S3.** Boxplot of monthly median air temperature from 2020 to 2096 years for RCP 4.5 with 12 climate models; bold red line indicate monthly median temperature for observed period (2011 to 2014).
